# Supplementary material for: Assessment of the Influence of Size and Concentration on the Ecotoxicity of Microplastics to Microalgae Scenedesmus sp., Bacterium Pseudomonas putida and Yeast Saccharomyces cerevisiae
Source: MDPI journal article supplement (doi:10.3390/polym14061246), 2022-03-19
Supplement: s1 [file s1]

## Supplementary Materials

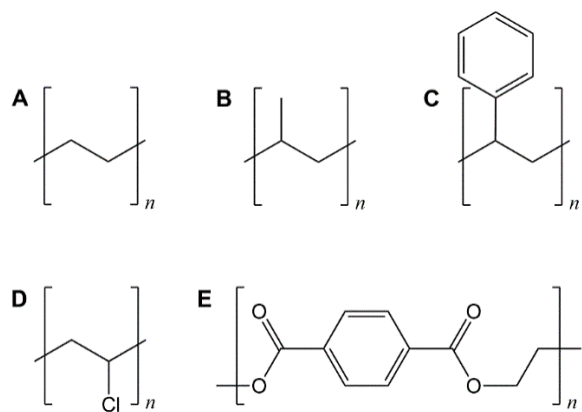

**Figure S1.** Structures of the applied microplastics: (A) polyethylene, (B) polypropylene, (C) polystyrene, (D) polyvinyl chloride, and (E) polyethylene terephthalate.

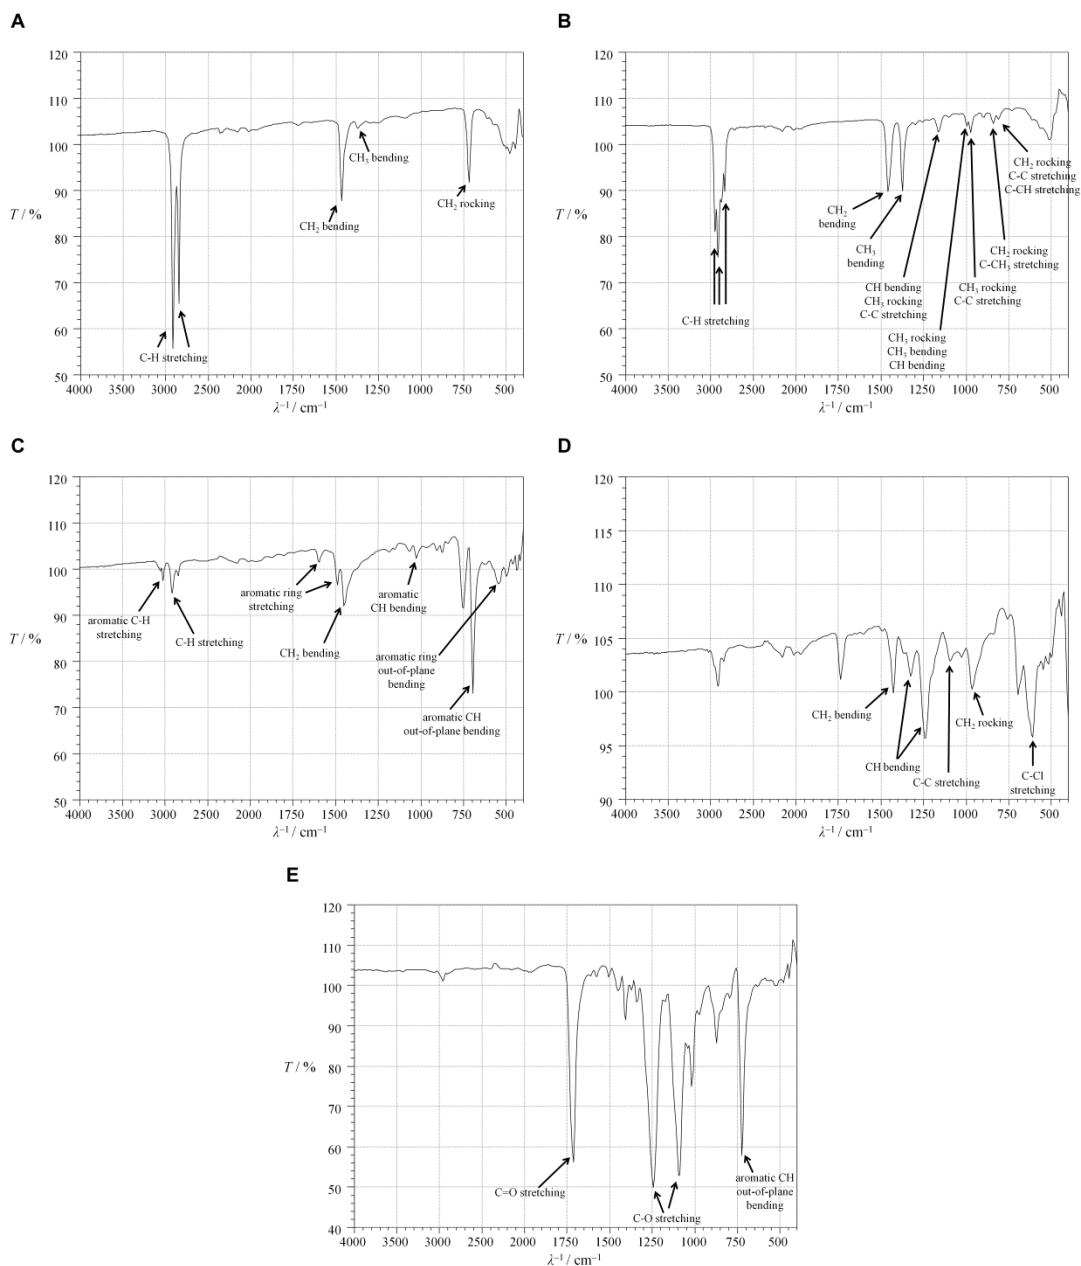

**Figure S2.** ATR-FTIR spectra of: (A) polyethylene, (B) polypropylene, (C) polystyrene, (D) polyvinyl chloride, and (E) polyethylene terephthalate.

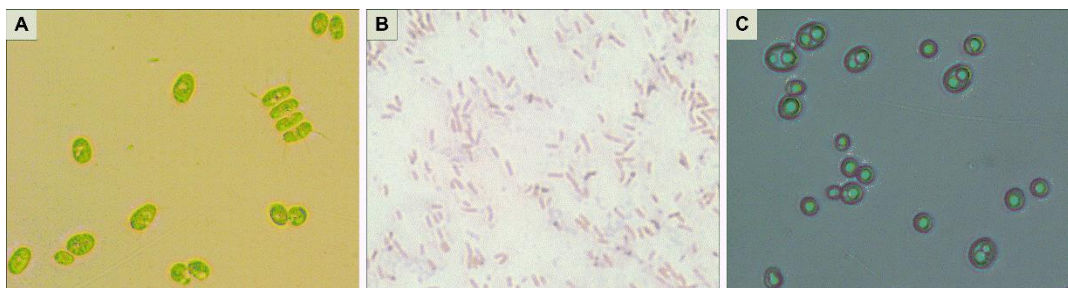

**Figure S3.** Microscopic images of test organisms used in the research: (A) microalgae *Scenedesmus* sp. (magnification 400×), (B) bacteria *Pseudomonas putida* (magnification 1000×), and (C) yeast *Saccharomyces cerevisiae* (magnification 400×).
